# Supplementary figures and images for: Neural circuit architecture defects in a Drosophila model of Fragile X syndrome are alleviated by minocycline treatment and genetic removal of matrix metalloproteinase
Source: PubMed Central journal article supplement — Dis Model Mech. 2011 Jun 13;4(5):673–85. doi: 10.1242/dmm.008045 (PMC3180232; doi:10.1242/dmm.008045), 2011-06-13

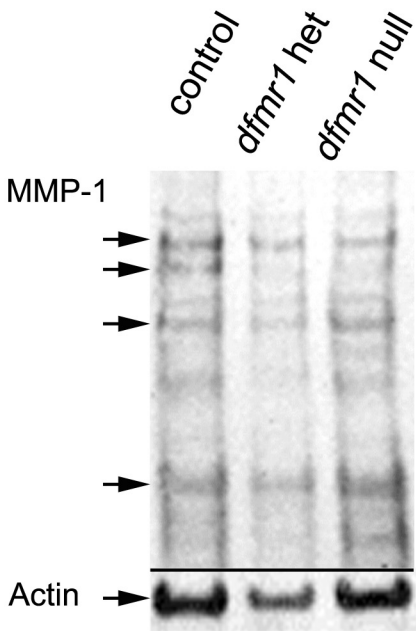

Supplement: supp_008045_DMM008045FigS1.pdf [file supp_008045_DMM008045FigS1.pdf]

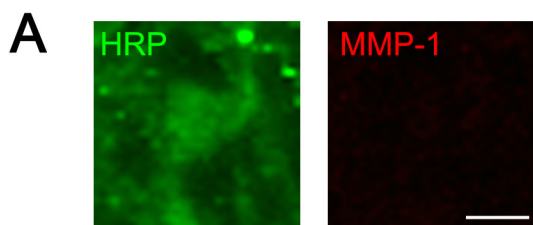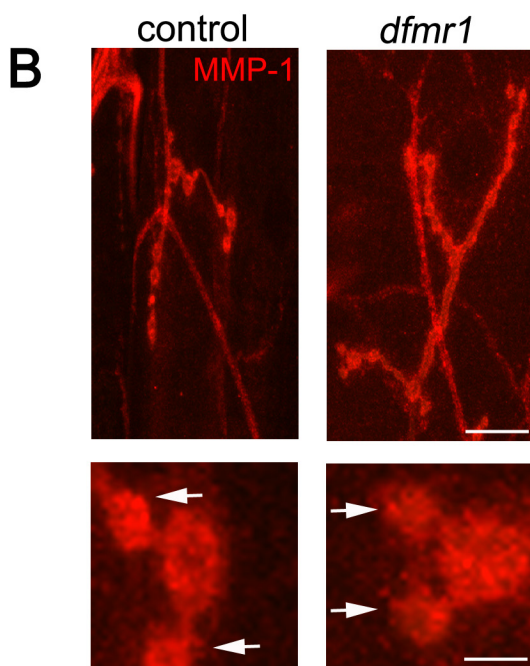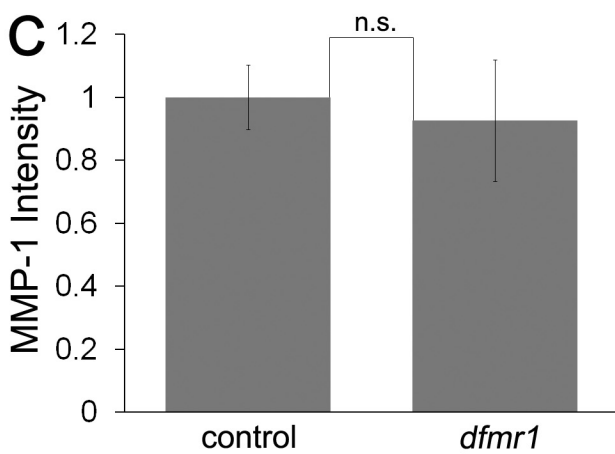

Supplement: supp_008045_DMM008045FigS2.pdf [file supp_008045_DMM008045FigS2.pdf]

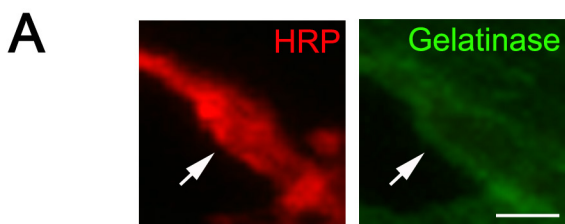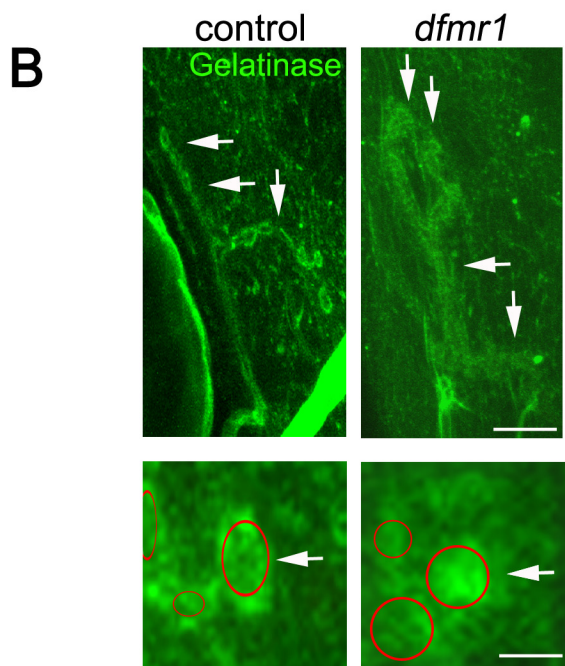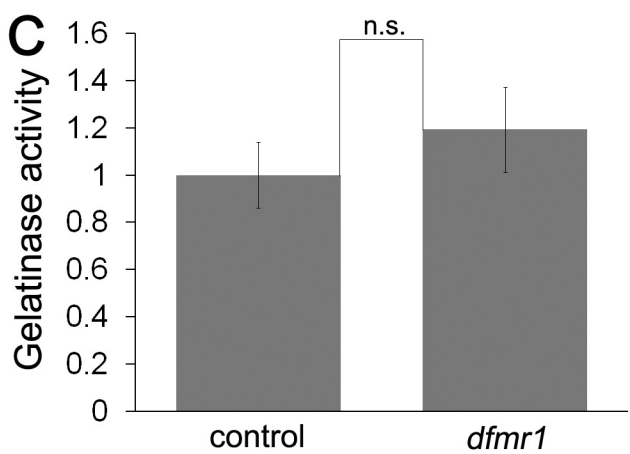

Supplement: supp_008045_DMM008045FigS3.pdf [file supp_008045_DMM008045FigS3.pdf]
